# Supplementary material
Source: Springer Nature journal article supplement (https://www.springermedizin.de/resource/supplementary/12967_2011_782_MOESM2_ESM.pdf/9577032)

**A**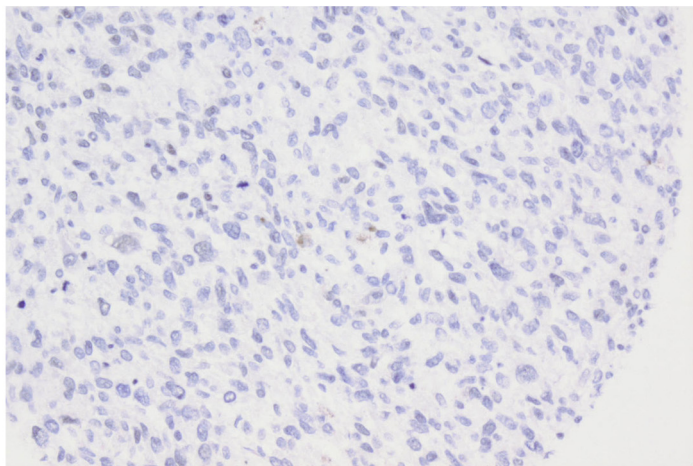**B**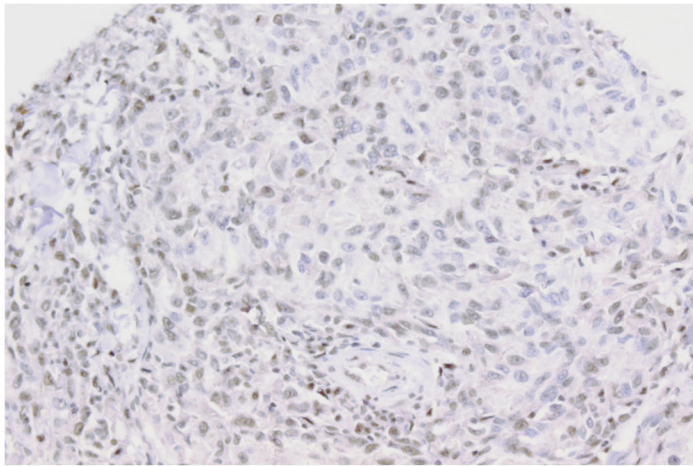**C**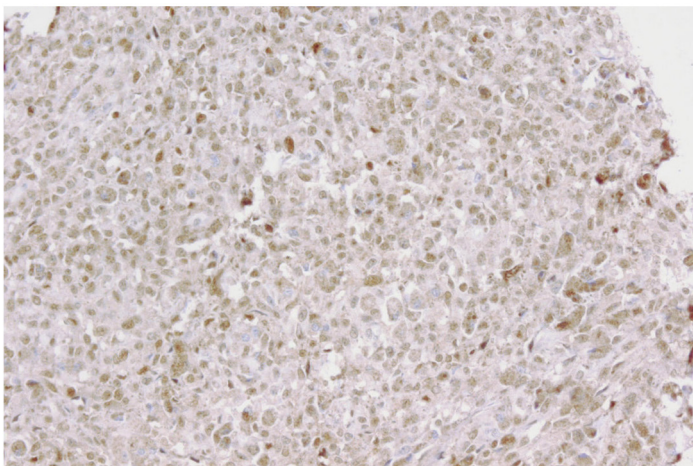**D**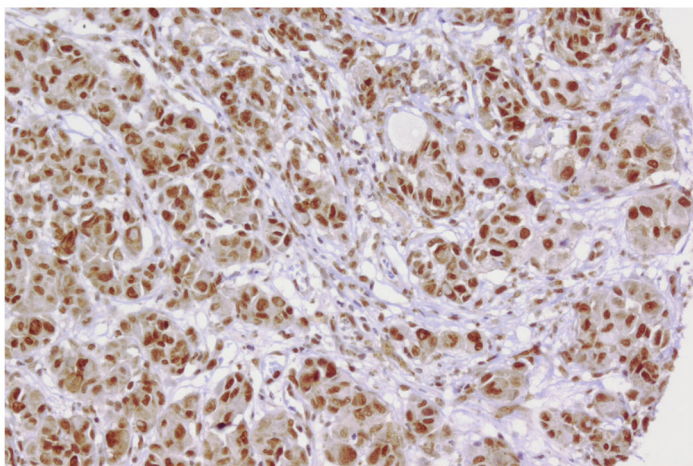**E**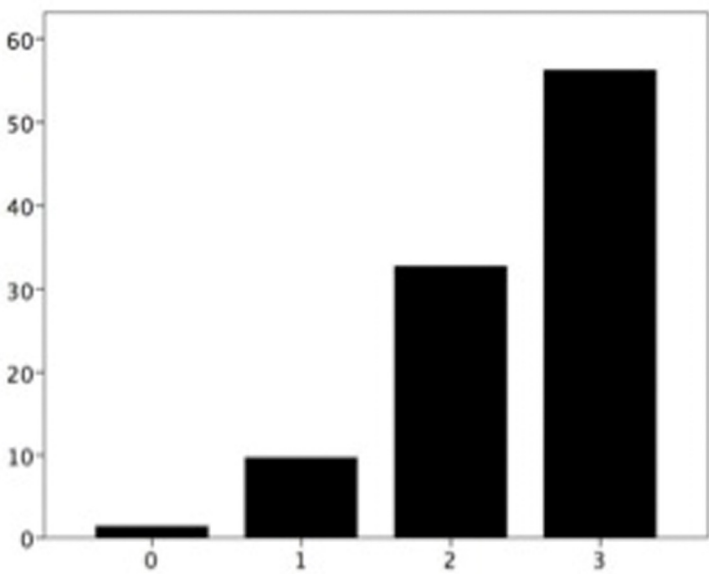**F**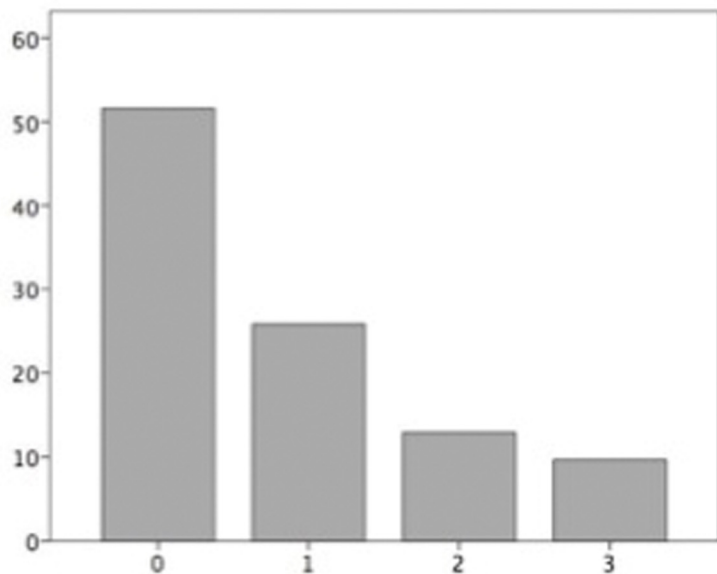

Supplement: MOESM2 [file 9577032]
